# Supplementary material for: Cross-Contamination of Ignitable Liquid Residues on Wildfire Debris—Detection and Characterization in Matrices Commonly Encountered at Wildfire Scenes
Source: MDPI journal article supplement (doi:10.3390/separations10090491), 2023-09-11
Supplement: s1 [file s1]

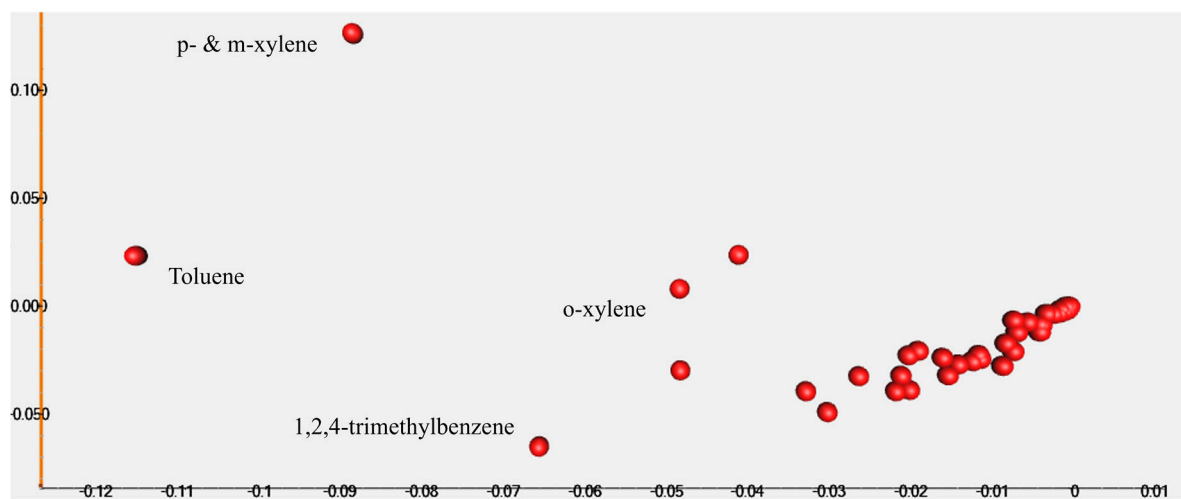

**Figure S1.** PCA loadings plot for targeted analysis (target compounds from Table 1) as relating to targeted PCA from Figure 4.
